# Supplementary material for: Association between intestinal microbiome and inflammatory bowel disease: Insights from bibliometric analysis
Source: PubMed Central journal article supplement (PMC9019919; doi:10.1016/j.csbj.2022.04.006), 2022-04-07
Supplement: mmc1.pdf [file mmc1.pdf]

---

## Supplementary Material

**Table S1. The 10 authors who published the most articles from 2000 to 2020 in the field of IBD and gut microbiome.**

| Author                      | Organization<br>(Country/Region)    | TP | TC    | H-index |
|-----------------------------|-------------------------------------|----|-------|---------|
| Ramnik J Xavier             | Harvard Med Sch (USA)               | 41 | 11506 | 34      |
| Harry Sokol                 | Sorbonne Universite<br>(France)     | 30 | 7165  | 26      |
| Scot E Dowd                 | Mol Res LP MR<br>DNA(USA)           | 17 | 1366  | 15      |
| Jan S Suchodolski           | Texas A&M University<br>System(USA) | 17 | 1701  | 18      |
| Curtis Huttenhower          | Harvard University (USA)            | 17 | 4416  | 20      |
| Gerhard Rogler              | Univ Hosp Zurich<br>(Switzerland)   | 15 | 680   | 13      |
| Akira Andoh                 | Shiga Univ Med Sci (Japan)          | 15 | 1480  | 19      |
| Charles N Bernstein         | Univ Manitoba (Canada)              | 14 | 1331  | 15      |
| Ashwin N<br>Ananthakrishnan | Massachusetts Gen Hosp<br>(USA)     | 14 | 4152  | 14      |
| Marteau P                   | Sorbonne Universite<br>(France)     | 13 | 4836  | 18      |

TP: total publications; TC: total citations.

**Table S2. The top journals from 2000 to 2020 in the field of IBD and gut microbiome.**

| Journal                                     | TP  | Percentage (%) | TC    | IF (2020) |
|---------------------------------------------|-----|----------------|-------|-----------|
| Inflamm. Bowel Dis                          | 211 | 5.42           | 11748 | 5.325     |
| PLoS One                                    | 147 | 3.78           | 7695  | 3.24      |
| Gut                                         | 90  | 2.31           | 13359 | 22.059    |
| World J. Gastroenterol                      | 88  | 2.26           | 5886  | 5.742     |
| Sci Rep                                     | 66  | 1.70           | 2034  | 4.379     |
| Dig. Dis                                    | 65  | 1.67           | 1639  | 2.404     |
| J. Crohns Colitis                           | 62  | 1.59           | 1812  | 9.071     |
| Front. Microbiol                            | 58  | 1.49           | 1713  | 5.64      |
| Gastroenterology                            | 56  | 1.44           | 12851 | 22.682    |
| Gut Microbes                                | 56  | 1.44           | 1583  | 10.245    |
| J. Immunol                                  | 51  | 1.31           | 3794  | 5.422     |
| Dig. Dis. Sci                               | 45  | 1.16           | 1252  | 3.199     |
| Proc. Natl. Acad. Sci. U. S. A              | 45  | 1.16           | 13289 | 11.205    |
| Front. Immunol                              | 44  | 1.13           | 981   | 7.561     |
| Am. J. Physiol.-Gastroint. Liver<br>Physiol | 43  | 1.11           | 2692  | 4.052     |
| Curr. Opin. Gastroenterol                   | 40  | 1.03           | 1767  | 3.287     |
| Nutrients                                   | 39  | 1.00           | 604   | 5.717     |
| J. Clin. Gastroenterol                      | 37  | 0.95           | 1626  | 3.062     |
| Mucosal Immunol                             | 36  | 0.93           | 1550  | 7.313     |
| J. Pediatr. Gastroenterol. Nutr             | 32  | 0.82           | 992   | 2.839     |

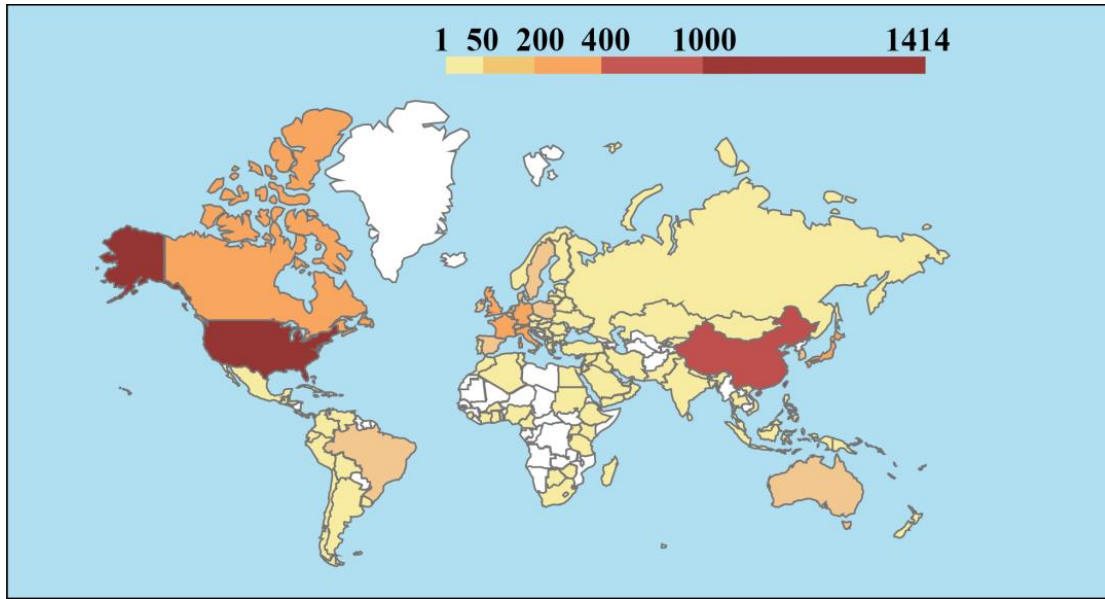

**Figure S1.** The global distribution of published articles from 2000 to 2020.

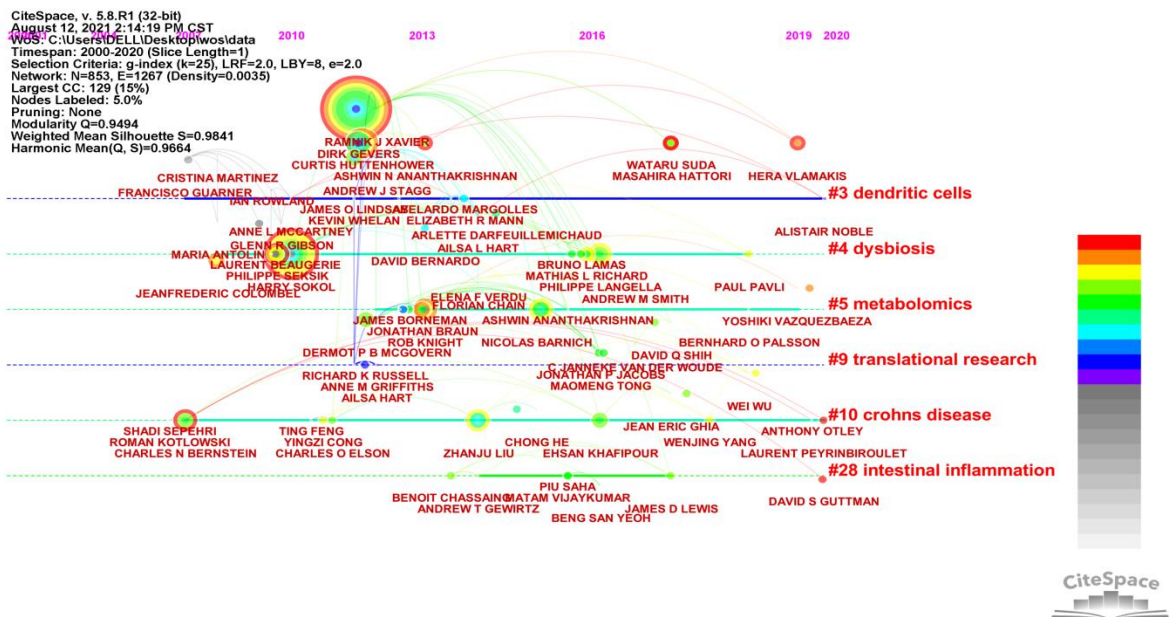

**Figure S2. Timeline of author clusters.** The timeline runs from left to right. The clusters are displayed from top to bottom in descending order of their size. The earliest cluster burst point was formed in 2002 and appeared in cluster #10. Around 2010, the main focus shifted to cluster #4, and after 2012, shifted to cluster #3.

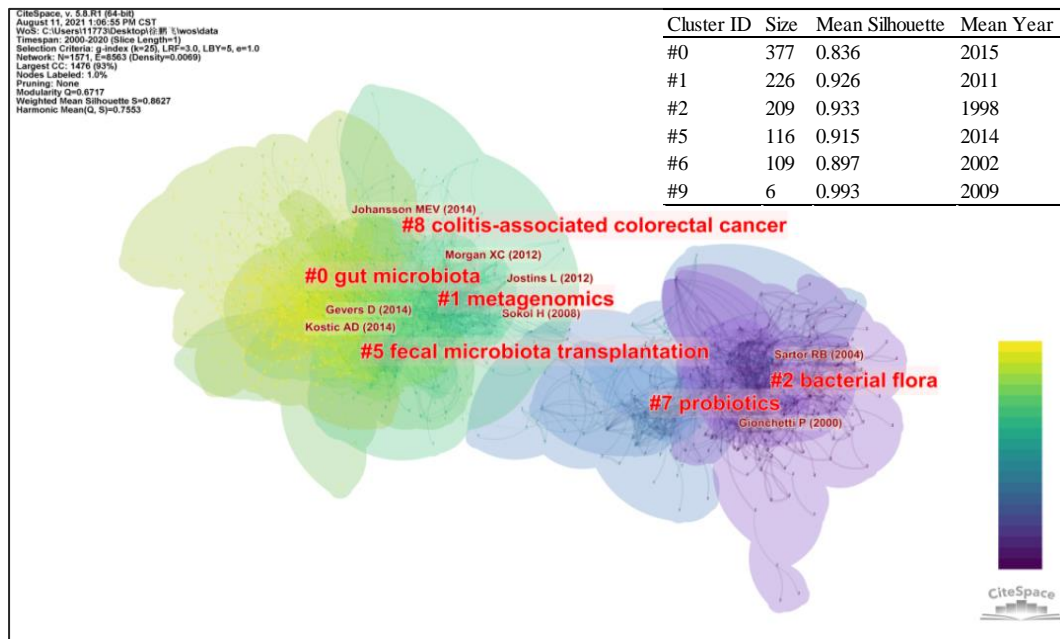

**Figure S3.** Cluster visualization of the co-cited network of references via Citespace, together with the details and the most representative references of the generated clusters.

| Cluster | References                                                                                            | Year | Strength | Begin | End  | 2000 - 2020 |
|---------|-------------------------------------------------------------------------------------------------------|------|----------|-------|------|-------------|
| #0      | Gevers D, 2014, CELL HOST MICROBE, V15, P382, DOI 10.1016/j.chom.2014.02.005, <a href="#">DOI</a>     | 2014 | 66.63    | 2016  | 2020 |             |
| #1      | Sokol H, 2008, P NATL ACAD SCI USA, V105, P16731, DOI 10.1073/pnas.0804812105, <a href="#">DOI</a>    | 2008 | 60.74    | 2009  | 2013 |             |
| #7      | Frank DN, 2007, P NATL ACAD SCI USA, V104, P13780, DOI 10.1073/pnas.0706625104, <a href="#">DOI</a>   | 2007 | 58.58    | 2008  | 2012 |             |
| #0      | Swidsinski A, 2002, GASTROENTEROLOGY, V122, P44, DOI 10.1053/gast.2002.30294, <a href="#">DOI</a>     | 2002 | 49.27    | 2002  | 2007 |             |
| #8      | Morgan XC, 2012, GENOME BIOL, V13, P0, DOI 10.1186/gb-2012-13-9-r79, <a href="#">DOI</a>              | 2012 | 48.22    | 2014  | 2017 |             |
| #1      | Jostins L, 2012, NATURE, V491, P119, DOI 10.1038/nature11582, <a href="#">DOI</a>                     | 2012 | 47.49    | 2013  | 2017 |             |
| #2      | Sartor RB, 2008, GASTROENTEROLOGY, V134, P577, DOI 10.1053/j.gastro.2007.11.059, <a href="#">DOI</a>  | 2008 | 46.2     | 2008  | 2013 |             |
| #5      | Kostic AD, 2014, GASTROENTEROLOGY, V146, P1489, DOI 10.1053/j.gastro.2014.02.009, <a href="#">DOI</a> | 2014 | 45.34    | 2016  | 2020 |             |

**Figure S4. Top 8 references with the strongest citation bursts.** The green bar represents the time period when the reference is cited and the red bar represents the time period when the cited reference appeared as a burst.
